# Supplementary material for: Artificial sgRNAs engineered for genome editing with new Cas12b orthologs
Source: PubMed Central journal article supplement (PMC6476878; doi:10.1038/s41421-019-0091-0), 2019-04-23
Supplement: 41421_2019_91_MOESM1_ESM.pdf [file 41421_2019_91_MOESM1_ESM.pdf]

## Supplementary Information

### Materials and Methods

**DNA manipulations.** DNA manipulation including DNA preparation, digestion, ligation, amplification, synthesis, purification, agarose gel electrophoresis, *etc.* were conducted according to *Molecular Cloning: A Laboratory Manual* with some modifications. Briefly, targeting chimeric single guide RNA (sgRNA) scaffolds for cell transfection assay were constructed by ligation annealed oligonucleotides (oligos) (Supplementary Table S3) into BsaI-digested pUC19-U6-sgRNA vectors (Supplementary Sequences) or directly *de novo* synthesized (Supplementary Table S4) into pUC19-U6 vector<sup>1</sup>.

**De novo gene synthesis and plasmid construction.** PSI-BLAST program<sup>2</sup> was adopted to identify new CRISPR-Cas12b orthologs. Their coding sequences were humanized<sup>3</sup> and oligos for Cas12b gene and sgRNA synthesis were designed using GeneDesign program<sup>4</sup>. All oligos for gene synthesis were commercially purchased (Taihe Biotechnology Co., LTD). For Cas12b coding genes which are >3 kb were split into 4 “chunks” of ~800 bp (Supplementary Table S1). For gRNAs which are <300 bp were left as is (Supplementary Tables S2 and S4). All oligos for gene synthesis were commercially purchased (Taihe Biotechnology Co., LTD). DNA fragments were synthesized using overlap extension PCR method according to our previous study<sup>1</sup>. Purified products were assembled into expression vectors via homologous recombination *in vitro* using NEBuilder® HiFi DNA Assembly Master Mix (NEB). The pCAG-2AeGFP and pUC19-U6 vectors<sup>1</sup> were applied for mammalian expression of Cas12b proteins and sgRNAs, respectively. AaCas12b, AkCas12b, AmCas12b, BsCas12b and their cognate sgRNAs have been previously reported<sup>1</sup>.

**Cell culture and transfection.** Human embryonic kidney 293T cells were cultured in Dulbecco’s Modified Eagle’s Medium (DMEM, Gibco) supplemented with 10% fetal bovine serum (FBS, Gibco) and 1% Antibiotic-Antimycotic (Gibco) at 37°C with 5% CO<sub>2</sub> incubation. 293T cells were transfected using Lipofectamine LTX (Invitrogen) following the manufacturer’s recommended protocol. For each well of a 48-well plate, a total of 400 ng

plasmid (Cas12b: sgRNA = 2: 1) were used. Then 48 h following transfection, cells were harvested directly for genomic DNA extraction without sorting.

**T7 endonuclease I (T7EI) assay and Sanger sequencing.** Harvested cells were lysed directly with Buffer L (Bimake) supplemented with Protease K and incubated at 55°C for 3 h and inactivated at 95°C for 10 min. Genomic region surrounding the Cas12b target site for each gene was PCR-amplified ([Supplementary Table S5](#)). 200 ~ 400 ng PCR products were mixed with ddH<sub>2</sub>O to a final volume of 10 µL, and subjected to re-annealing process to enable heteroduplex formation according to previous methods<sup>5</sup>. After re-annealing, products were treated with 1/10 volume of NEBuffer™ 2.1 and 0.2 µL T7EI (NEB) at 37 °C for 30 min, and analyzed on 3% agarose gels. Indels were quantitated based on relative band intensities<sup>6</sup>. T7EI assay identified mutated products were subjected to be cloned into TA cloning vector and transformed into competent *E. coli* strain (Transgen Biotech). After overnight culture, colonies were randomly picked out and sequenced.

For each sample, transfection and T7EI assay were repeated twice or more and a representative result was shown. The histogram in this study represented the mean value of two independent repeats.

## References

1. Teng, F. et al. Repurposing CRISPR-Cas12b for mammalian genome engineering. *Cell Discov.* **4**, 63 (2018).
2. Altschul, S.F. et al. Gapped BLAST and PSI-BLAST: a new generation of protein database search programs. *Nucleic Acids Res.* **25**, 3389-3402 (1997).
3. Grote, A. et al. JCat: a novel tool to adapt codon usage of a target gene to its potential expression host. *Nucleic Acids Res.* **33**, W526-531 (2005).
4. Richardson, S.M., Wheelan, S.J., Yarrington, R.M. & Boeke, J.D. GeneDesign: rapid, automated design of multikilobase synthetic genes. *Genome Res.* **16**, 550-556 (2006).
5. Li, W., Teng, F., Li, T. & Zhou, Q. Simultaneous generation and germline transmission of multiple gene mutations in rat using CRISPR-Cas systems. *Nat. Biotechnol.* **31**, 684-686 (2013).
6. Cong, L. et al. Multiplex genome engineering using CRISPR/Cas systems. *Science* **339**, 819-823 (2013).

# Figure S1

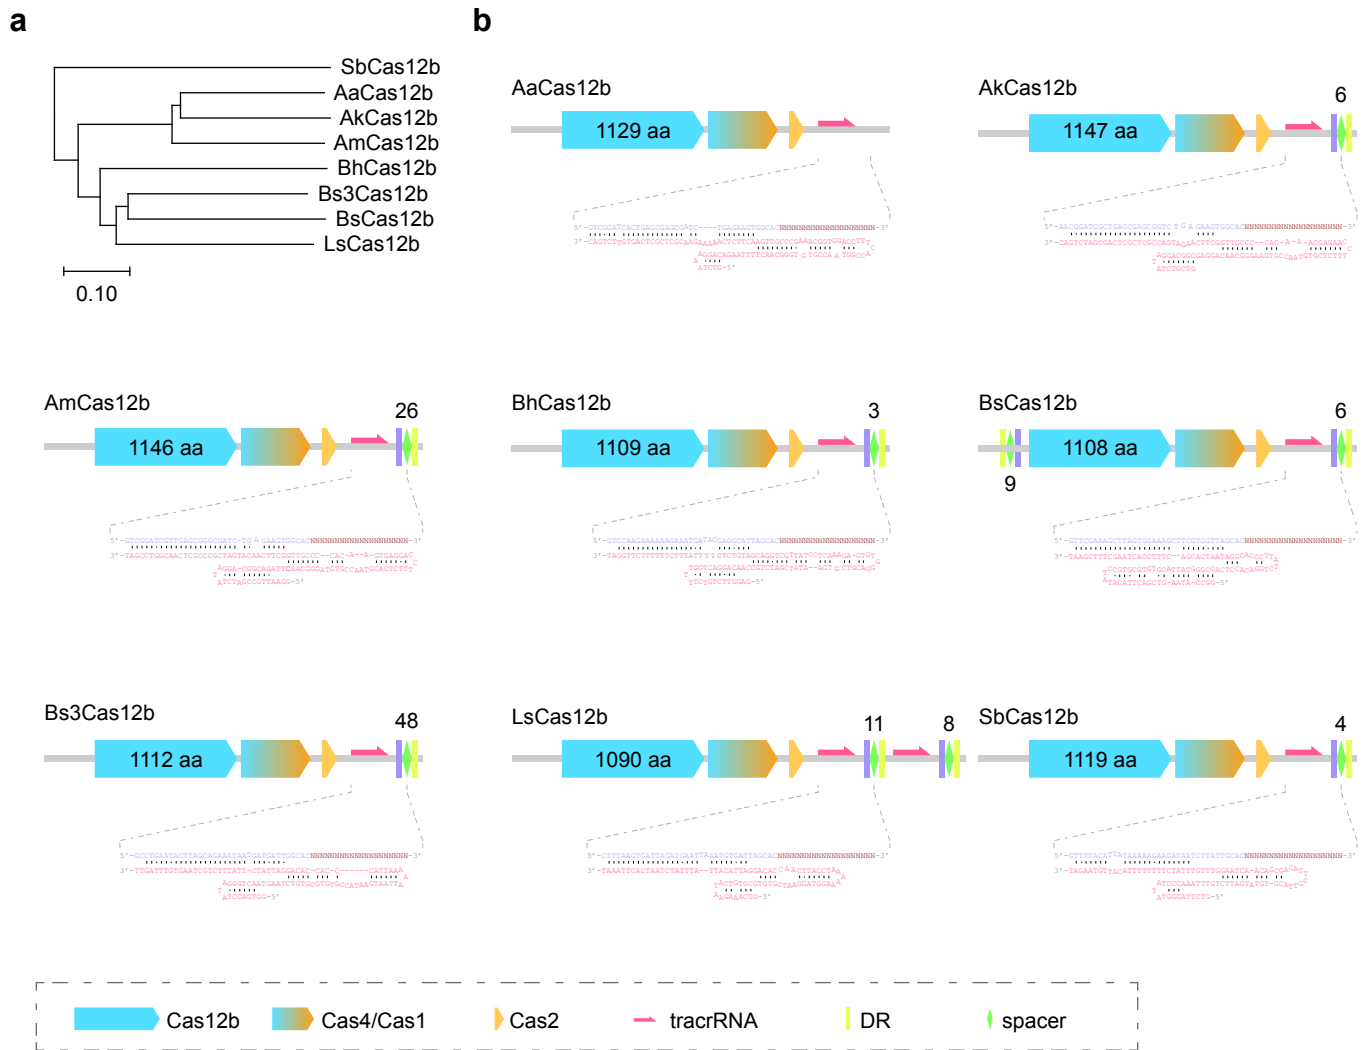

**Figure S1 Phylogenetic tree of non-redundant Cas12b orthologs and their loci chosen for genome-editing testing.** **(a)** Neighbor Joining phylogenetic tree showing the evolutionary relationships of Cas12b orthologs tested in this study. **(b)** Maps of bacterial genomic loci corresponding to the eight Cas12b proteins in [Supplementary Fig. S1a](#). In silico co-folding of the crRNA DR and putative tracrRNA shows stable secondary structure. DR, direct repeat. The number of each bacterial genomic spacers is indicated above their CRISPR array.

Figure S2

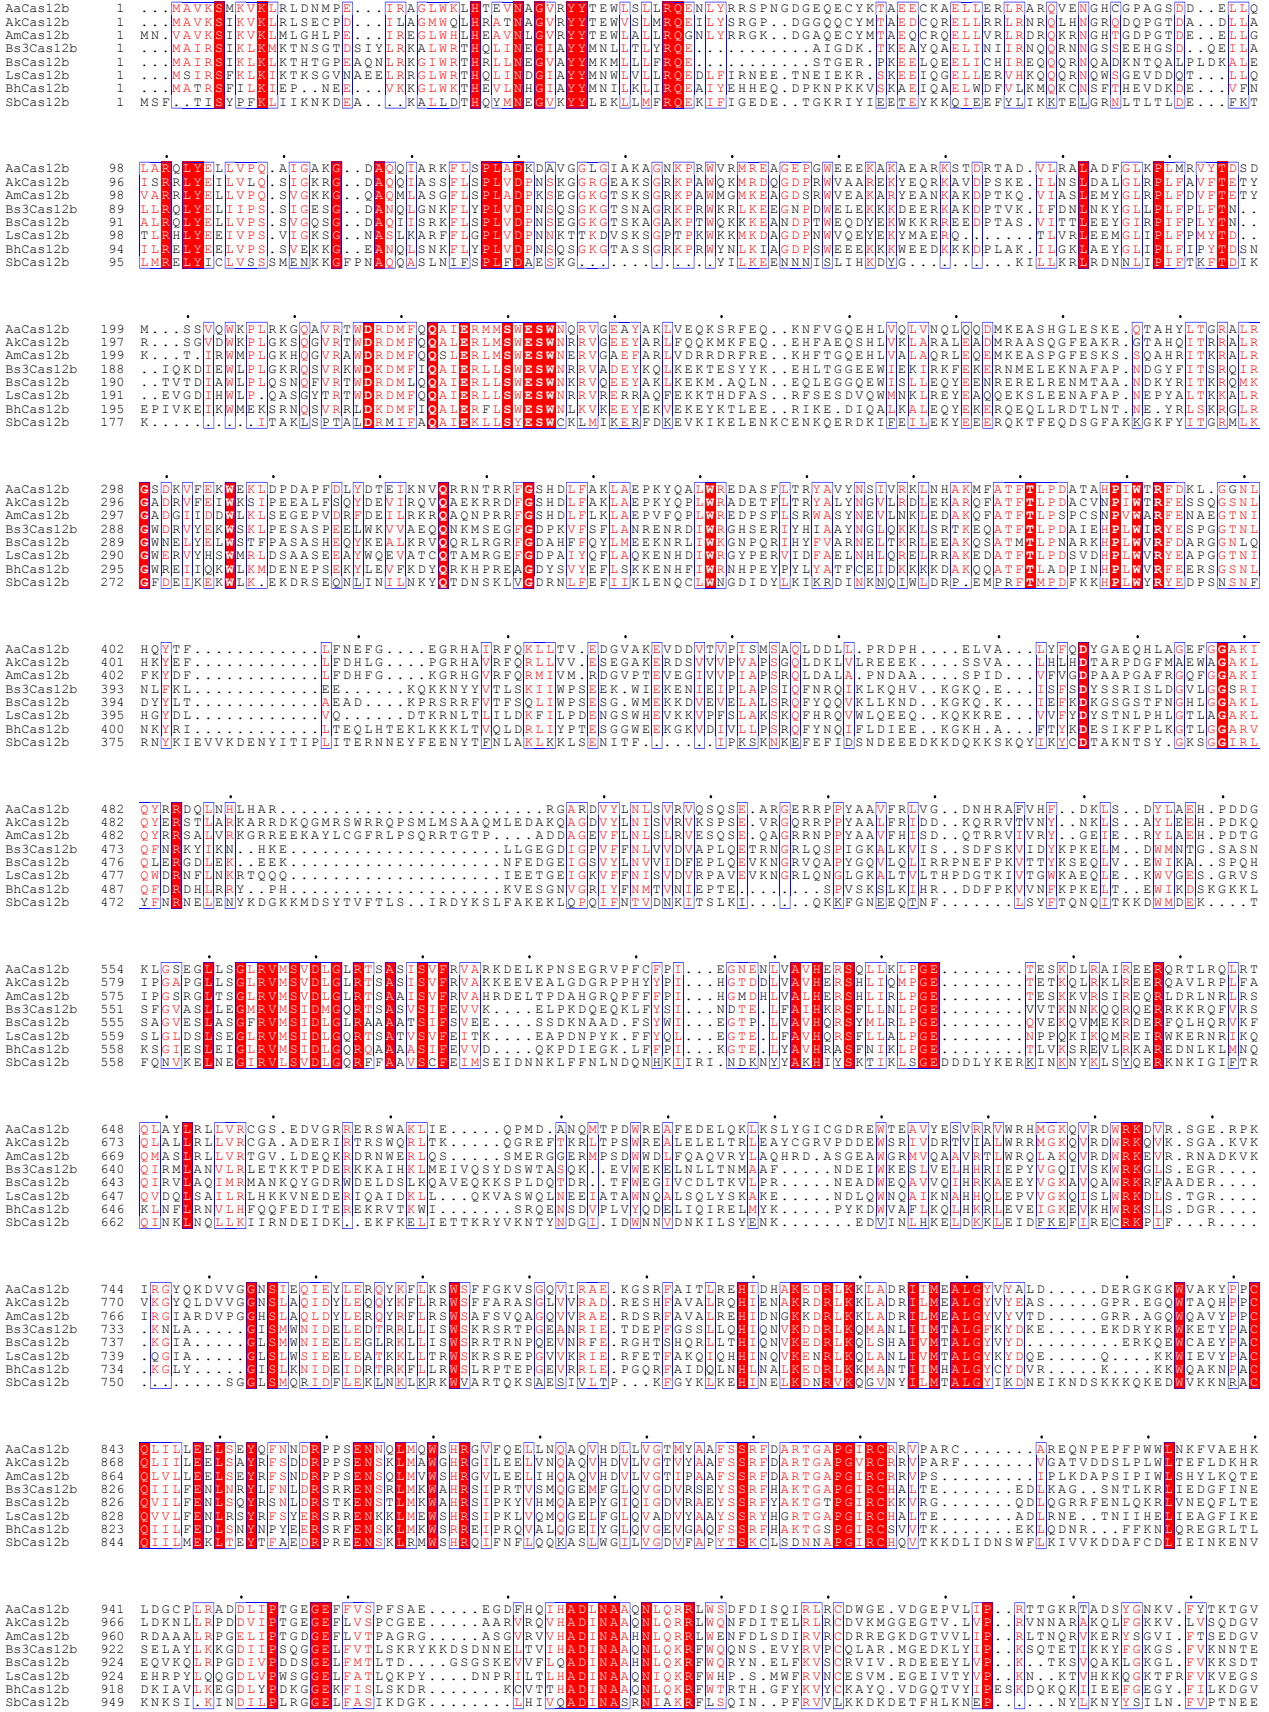

**Figure S2 Protein alignment of Cas12b orthologs.** Multiple sequence alignment of the amino acid sequences of the eight Cas12b orthologs tested in this study. Residues that are conserved are highlighted with a red background and conserved mutations are highlighted with an outline and red font.

# Figure S3

**a**

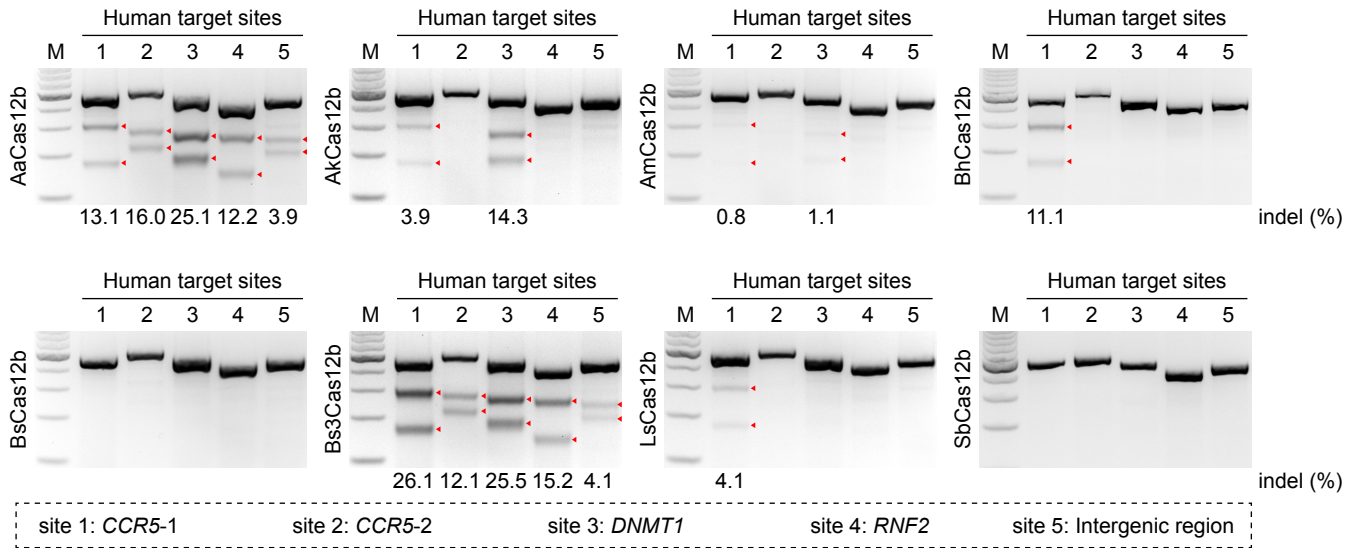

**b**

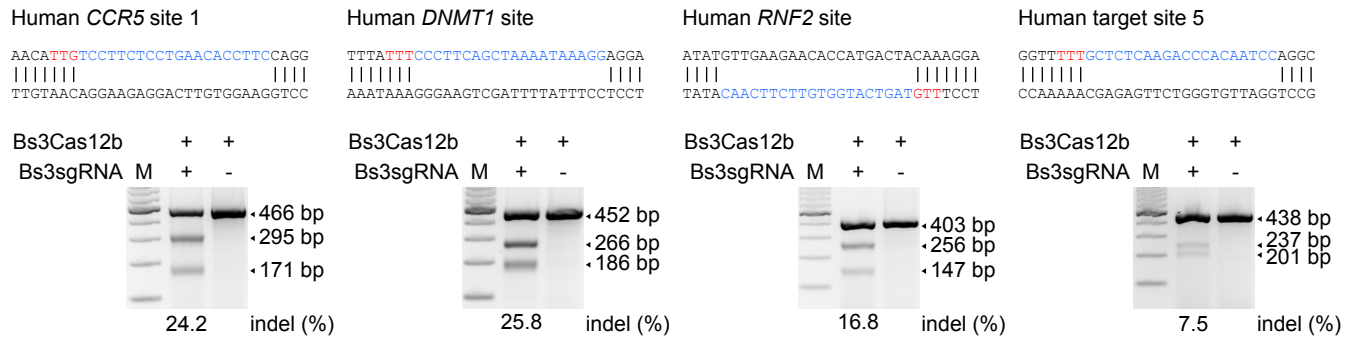

**c**

|                                                       |       |                                                  |       |
|-------------------------------------------------------|-------|--------------------------------------------------|-------|
| Human <i>CCR5</i> site 1                              | indel | Human <i>DNMT1</i> site                          | indel |
| CATTTGTCCTTCTCCTGAACACCT-----TCCAGGAATTCTT            |       | TATTTCCCTTCAGCTAAAATAAAGGAGGAGGAAGCTGCTAAGGAC    |       |
| CATTGTCCTTCTCCTGAACACCTgaaggcccaaggAGGAATTCTT Δ3, +12 |       | TATTTCCCTTCAGCT-----GGAGGAGGAAGCTGCTAAGGAC Δ8    |       |
| CATTGTCCTTCTCCTGAACA-----GGAATTCTT Δ7                 |       | TATTTCCCTTCAGCTAAAA-----GGAAGCTGCTAAGGAC Δ10     |       |
| CATTGTCCTTCTCCTGAA-----GGAATTCTT Δ9                   |       | TATTTCCCTTCAG-----GAAGCTGCTAAGGAC Δ17            |       |
| CATTGTCCTT----- (Δ27 bp) ----- Δ27                    |       | TATTTCCCTTCAGCTAAA-----GGAC Δ23                  |       |
|                                                       |       | TATTTCCCTTC----- (Δ48 bp) ----- Δ48              |       |
| Human <i>RNF2</i> site                                | indel | Human target site 5                              | indel |
| CCAATTTGTTTGATATGTTGA--AGAACACCATGACTACAAAG           |       | TTTTGTCTCTCAAGACCCACA-----GGCCGGAAGAGGCAAGCAT    |       |
| CCAATTTGTTTGATATGTTGAtgaAGAACACCATGACTACAAAG +3       |       | TTTTGTCTCTCAAGACCCACA-----GGCCGGAAGAGGCAAGCAT Δ5 |       |
| CCAATTTGTTTGATATGTT-----GAACACCATGACTACAAAG Δ3        |       | TTTTGTCTCTCAAGACCCACAA-----AGAGGCAAGCAT Δ11      |       |
| CCAATTTGTTTGATATGTT-----AGAACACCATGACTACAAAG Δ7       |       |                                                  |       |
| CCAATTTGTTTGATATGTT-----AGAACACCATGACTACAAAG Δ8       |       |                                                  |       |
| CCAATTTGTTTGATATGTT-----CACCATGACTACAAAG Δ11          |       |                                                  |       |
| CCAATTT-----GACTACAAAG Δ25                            |       |                                                  |       |

**Figure S3 Cas12b orthologs mediated genome targeting in human 293T cells.** **a** T7EI assay results indicating the genome targeting activities of the eight Cas12b proteins combined with their cognate sgRNAs in the human genome, respectively. Red triangles indicate the cleaved bands. **b** T7EI assay results indicating the simultaneous multiplex genome targeting mediated by Bs3Cas12b combined with its cognate sgRNAs (Bs3sgRNAs) in human 293T cells. **c** Sanger sequencing showing representative indels induced by Bs3Cas12b combined with Bs3sgRNAs in [Supplementary Fig. S3b](#). PAM and protospacer sequences are colored in red and blue, respectively. Deletions and insertions are symbolled with purple dashes and green lowercases, respectively.



# Figure S4

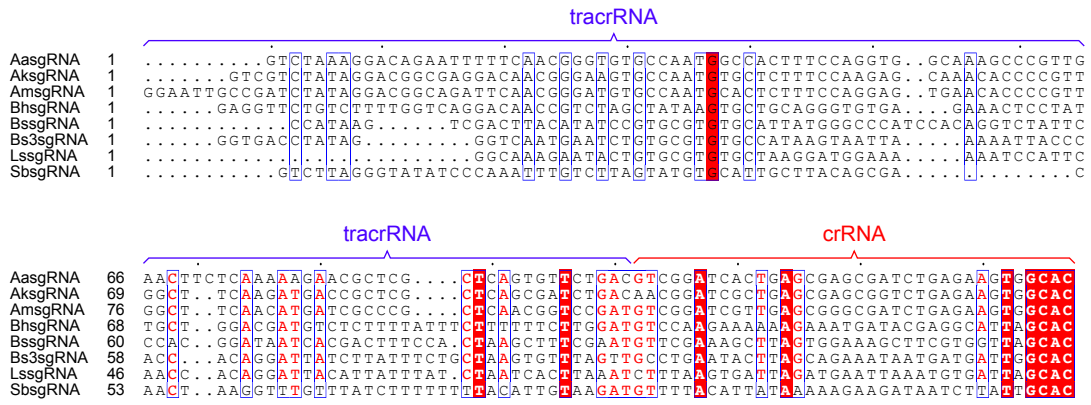

**Figure S4 DNA alignment of sgRNAs of Cas12b.** Multiple sequence alignment of the DNA sequences of the 8 sgRNAs derived from the 8 Cas12b loci tested in this study.

**Figure S5**

**a**

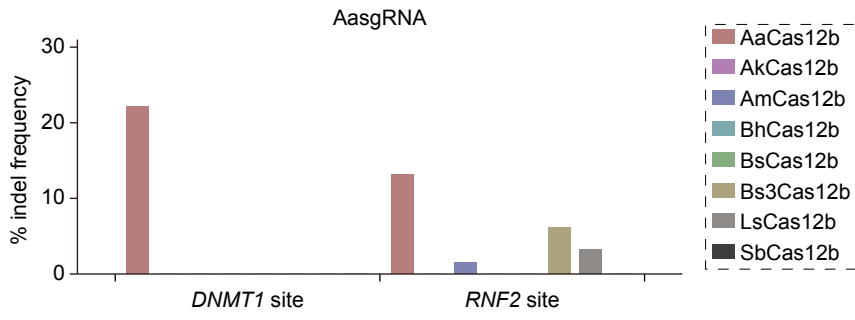

**b**

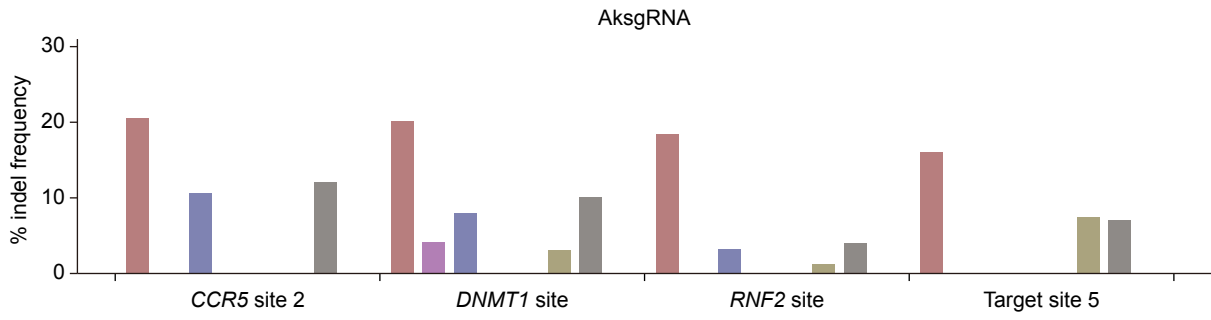

**c**

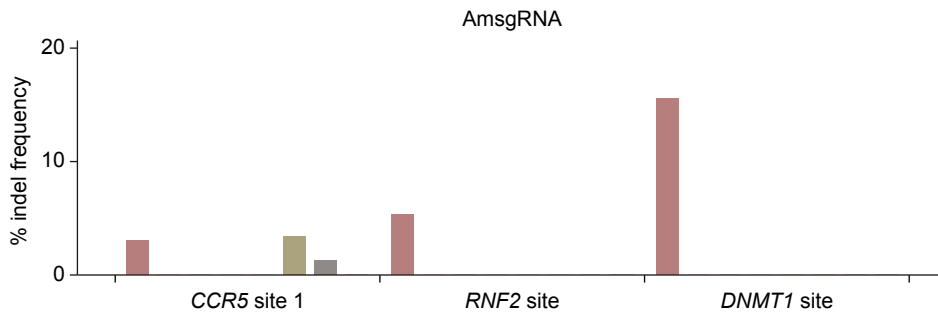

**d**

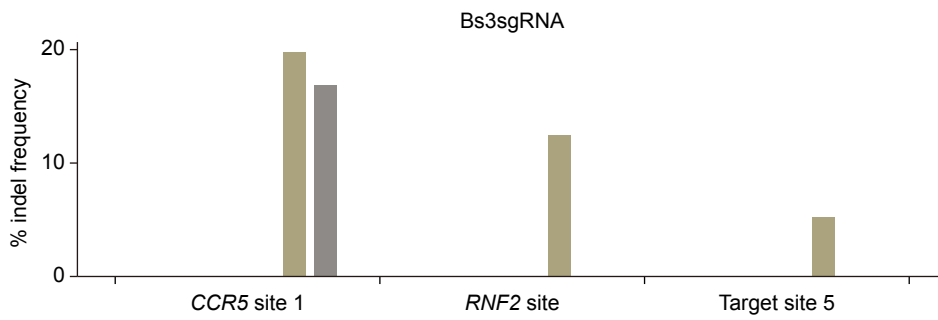

**e**

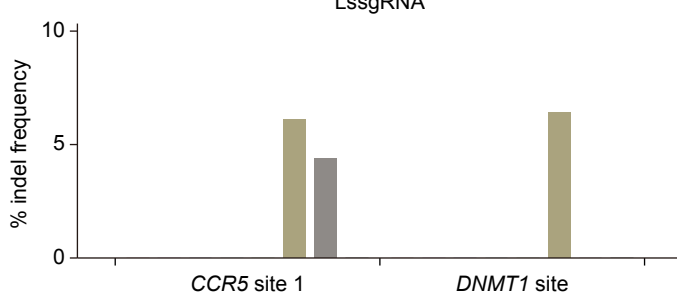

**Figure S5 Interchangeability between Cas12b orthologs and their sgRNAs.** T7EI assay results indicating the average genome targeting activities of the eight Cas12b orthologs directed by AasgRNA **(a)**, AksgRNA **(b)**, AmsgRNA **(c)**, Bs3sgRNA **(d)** and LssgRNA **(e)** in human 293T cells, respectively. Red triangles indicate the cleaved bands. n = 2.

**Figure S6**

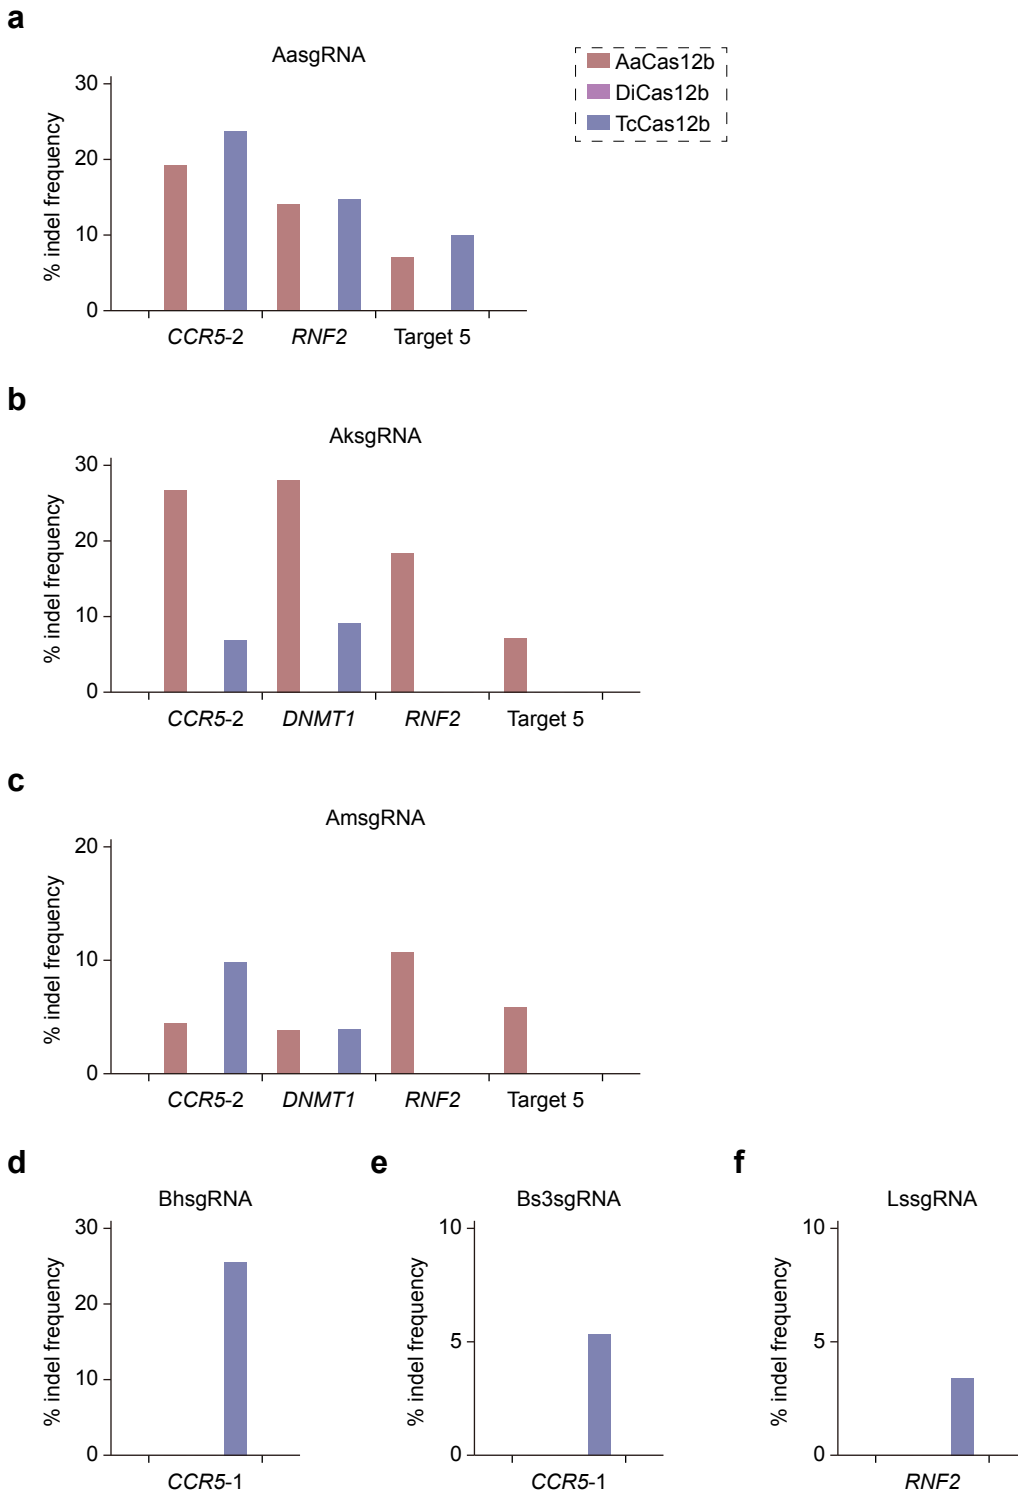

**Figure S6 Orthologous sgRNAs directed Cas12b for genome editing.** T7EI assay results indicating the average genome targeting activities of AaCas12b, DiCas12b and TcCas12b directed by AasgRNA **(a)**, AksgRNA **(b)**, AmsgRNA **(c)**, BhsgRNA **(d)**, Bs3sgRNA **(e)** and LssgRNA **(f)** in the human 293T cells, respectively. Red triangles indicate the cleaved bands. n = 2.

# Figure S7

**a**

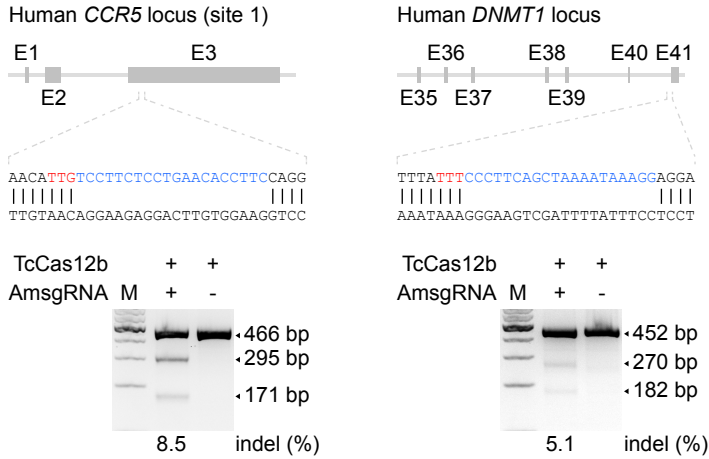

**b**

**AksgRNA-CCR5-1** indel

TACAACATGTCCTTCCTGAAACACCTTCAGGAATTCTTTGGCCTGAATAATTGCAGT  
TACAACATTGTCCTTCCTGAAACACCT-----AATTCTTTGGCCTGAATAATTGCAGT Δ6  
TACAACATTGTCCTTCCTGAAACA-----TCTTTGGCCTGAATAATTGCAGT Δ12  
TACAACATTGTCCTTCCTGAA-----TAATTGCAGT Δ27

**AksgRNA-DNMT1** indel

CCTTTTATTTCCCTTCAGCTAAAATAAAGGAGGAGGAAGCTGCTAAGGACTAGTTCTGCC  
CCTTTTATTTCCCTTCAGCTAAA-----GGAGGAGGAAGCTGCTAAGGACTAGTTCTGCC Δ5  
CCTTTTATTTCCCTTCAGCTAAAa-----AGGAAGCTGCTAAGGACTAGTTCTGCC Δ9, +1  
CCTTTTATTTCCCTTCAGCTAAA-----TGCTAAGGACTAGTTCTGCC Δ17

**c**

**AmsgRNA-CCR5-1** indel

TACAACATGTCCTTCCTGAAACACCTTCAGGAATTCTTTGGCCTGAATAATTGCAGT  
TACAACATTGTCCTTCCTGAAACACCTga-AGGAATTCTTTGGCCTGAATAATTGCAGT Δ3, +2  
TACAACATTGTCCTTCCTGAAACA--TCCAGGAATTCTTTGGCCTGAATAATTGCAGT Δ3  
TACAACATTGTCCTTCCTGAAACACCga--AGGAATTCTTTGGCCTGAATAATTGCAGT Δ4, +2  
TACAACATTGTCCTTCCTGAAACACCT--GGAATTCTTTGGCCTGAATAATTGCAGT Δ4  
TACAACATTGTCCTTCCTGAAACACC-----AATTCTTTGGCCTGAATAATTGCAGT Δ7  
TACAACATTGTCCTTCCTGAA-----TAATTGCAGT Δ27  
TACAACATTGTCCTTCCTC-----AATTGCAGT Δ32

**AmsgRNA-DNMT1** indel

CCTTTTATTTCCCTTCAGCTAAAATAAAGGAGGAGGAAGCTGCTAAGGACTAGTTCTGCC  
CCTTTTATTTCCCTTCAGCTAAAata--GAGGAGGAAGCTGCTAAGGACTAGTTCTGCC Δ6, +4  
CCTTTTATTTCCCTTCAGCTAAAAT-----GGAGGAGCTGCTAAGGACTAGTTCTGCC Δ6  
CCTTTTATTTCCCTTCAGCTAAAag-----GGAAGCTGCTAAGGACTAGTTCTGCC Δ11, +1  
CCTTTTATTTCCCTTCAGCTAAA-----GGAAGCTGCTAAGGACTAGTTCTGCC Δ11  
CCTTTTATTTCCCTTCAGCT-----GAAGCTGCTAAGGACTAGTTCTGCC Δ15

**Figure S7 TcCas12b-mediated multiplex genome editing.** **a** T7EI assay results indicating the simultaneous multiplex genome targeting mediated by TcCas12b combined with AmsgRNAs in human 293T cells. **b-c** Sanger sequencing showing representative indels induced by TcCas12b combined with AksgRNAs in [Fig. 1h \(b\)](#) and AmsgRNAs in [Supplementary Fig. S7a \(c\)](#). PAM and protospacer sequences are colored in red and blue, respectively. Deletions and insertions are symbolled with purple dashes and green lowercases, respectively.





**b**

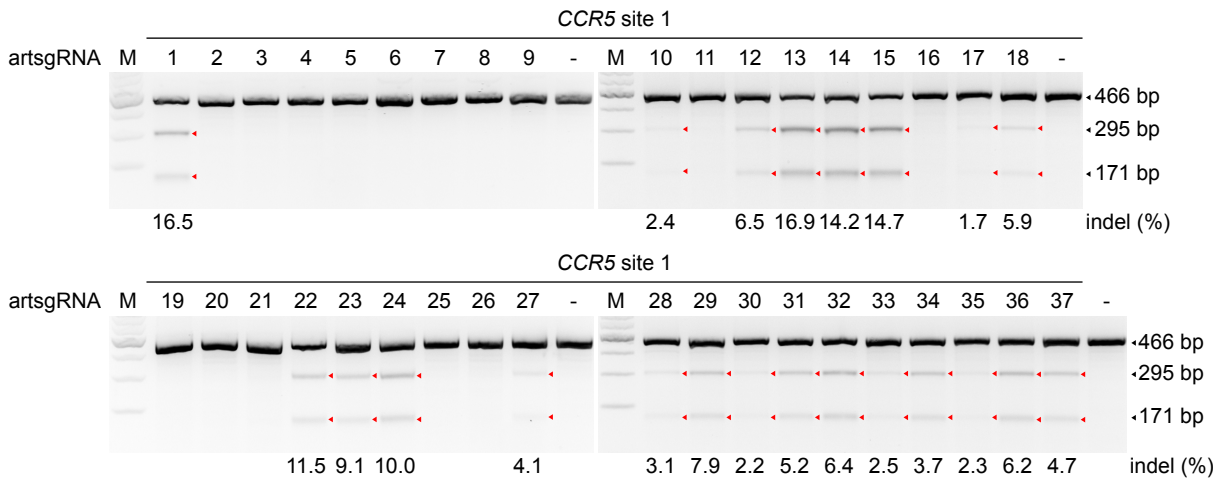

**c**

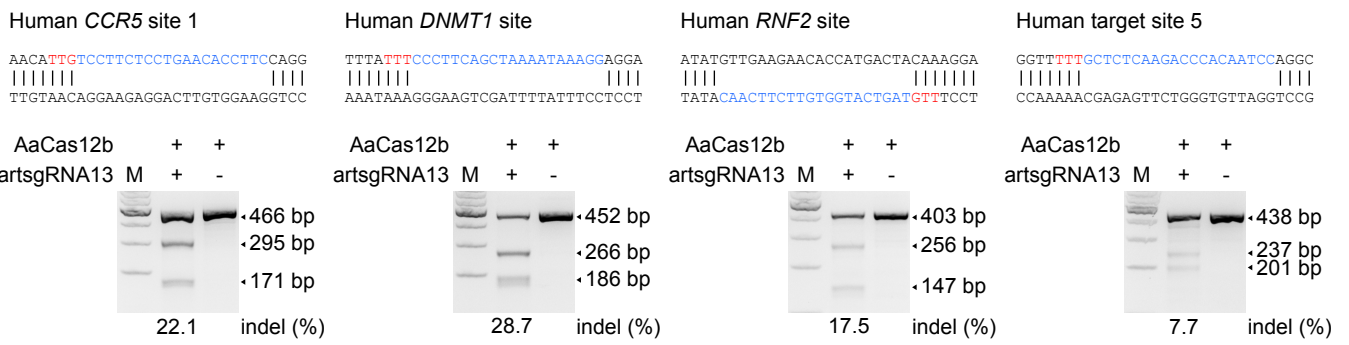

**Figure S8 Artificial sgRNAs directed TcCas12b for genome editing.** **a** Schematic illustrating the secondary structures of the 36 artificial sgRNA (artsgRNA) scaffolds (scaffold: 1 - 12 and 14 - 37). **b** T7EI assay results indicating the genome targeting activity of TcCas12b directed by artsgRNAs in the human 293T cells. Red triangles indicate the cleaved bands. **c** T7EI assay results indicating the simultaneous multiplex genome targeting mediated by AaCas12b combined with artsgRNA13s in human 293T cells.

**Supplementary Table 1 Oligonucleotides (oligos) for Cas12b gene synthesis. (see attached XLSX file)**

**Supplementary Table 2 Oligos for sgRNA scaffold synthesis. (see attached XLSX file)**

**Supplementary Table 3 Protospacer sequences of human genomic targets.** Protospacer targets designed based on type V-B CRISPR-Cas12b locus and type V-A CRISPR-Cas12a locus with their requisite PAMs against different genes in the human genome.

| CRISPR-Cas | Gene              | Protospacer ID | Protospacer sequences (5' - 3') | 5' PAM | Strand |
|------------|-------------------|----------------|---------------------------------|--------|--------|
| Cas12b     | <i>CCR5</i>       | <i>CCR5-1</i>  | TCCTTCTCCTGAACACCTTC            | TTG    | +      |
|            |                   | <i>CCR5-2</i>  | TTTGGCCTGAATAATTGCAG            | TTC    | +      |
|            | <i>DNMT1</i>      | <i>DNMT1</i>   | CCCTTCAGCTAAAATAAAGG            | TTT    | +      |
|            | <i>RNF2</i>       | <i>RNF2</i>    | TAGTCATGGTGTTCCTTCAAC           | TTG    | -      |
|            | Intergenic region | Target 5       | GCTCTCAAGACCCACAATCC            | TTT    | +      |
| Cas12a     | <i>CCR5</i>       | <i>CCR5-1</i>  | TCCTTCTCCTGAACACCTTCCAG         | TTG    | +      |
|            |                   | <i>CCR5-2</i>  | GCCTGAATAATTGCAGTAGCTCT         | TTTG   | +      |
|            | <i>DNMT1</i>      | <i>DNMT1</i>   | CCTTCAGCTAAAATAAAGGAGGA         | TTTC   | +      |
|            | <i>RNF2</i>       | <i>RNF2</i>    | GATATGTTGAAGAACCACCATGAC        | TTTG   | +      |
|            | Intergenic region | Target 5       | CTCTCAAGACCCACAATCCAGGC         | TTTG   | +      |

**Supplementary Table 4 Oligos for artificial sgRNA (artsgRNA) synthesis. (see attached XLSX file)**

**Supplementary Table 5 Primers used for T7EI assay in this study.**

| Primer ID              | Primer sequences (5' - 3')                            | Product length (bp) | Cleaved bands (bp) |
|------------------------|-------------------------------------------------------|---------------------|--------------------|
| CCR5-1F<br>CCR5-1R     | GTCTGCGCTGCTTGTCAT<br>CCCCTTGAGTCCGTGTCACA            | 466                 | 295 + 171          |
| CCR5-2F<br>CCR5-2R     | GCAGCTCTCATTTTCCATACAGT<br>GATCGGGTGTAAGCTGAGCTTG     | 493                 | 277 + 216          |
| DNMT1-F<br>DNMT1-R     | CTCCTGCTCGGTGAATTTGG<br>TAGTTGATAAGCGAACCTCACAC       | 452                 | 270 + 182          |
| RNF2-F<br>RNF2-R       | GGAGCTGTAGGCGATTATAGTTGAA<br>TTCTCAAACCCTGGAAAGCACTTT | 403                 | 256 + 147          |
| Target5-F<br>Target5-R | ACTTCCACCCTCTGTCTTATCTC<br>CCAGCTTCCTCAAATCTTATGCA    | 438                 | 237 + 201          |



## Supplementary Sequences

### Humanized BhCas12b coding sequence from *Bacillus hisashii* strain C4 (GeneBank ID: NZ\_NJGA01000060.1)

ATGGCCACCCGCAGCTTCATCCTGAAGATCGAGCCCAACGAGGAGGTGAAGAAGGGCCTGTG  
GAAGACCCACGAGGTGCTGAACCACGGCATCGCCTACTACATGAACATCCTGAAGCTGATCC  
GCCAGGAGGCCATCTACGAGCACCACGAGCAGGACCCCAAGAACCCCAAGAAGGTGAGCAAG  
GCCGAGATCCAGGCCGAGCTGTGGGACTTCGTGCTGAAGATGCAGAAGTGCAACAGCTTCAC  
CCACGAGGTGGACAAGGACGAGGTGTTCAACATCCTGCGCGAGCTGTACGAGGAGCTGGTGC  
CCAGCAGCGTGGAGAAGAAGGGCGAGGCCAACCAGCTGAGCAACAAGTTCCTGTACCCCCCTG  
GTGGACCCCAACAGCCAGAGCGGCAAGGGCACCGCCAGCAGCGGCCGCAAGCCCCGCTGGTA  
CAACCTGAAGATCGCCGGCGACCCCAGCTGGGAGGAGGAGAAGAAGAAGTGGGAGGAGGACA  
AGAAGAAGGACCCCCCTGGCCAAGATCCTGGGCAAGCTGGCCGAGTACGGCCTGATCCCCCTG  
TTCATCCCCTACACCGACAGCAACGAGCCCATCGTGAAGGAGATCAAGTGGATGGAGAAGAG  
CCGCAACCAGAGCGTGCGCCGCTGGACAAGGACATGTTTCATCCAGGCCCTGGAGCGCTTCC  
TGAGCTGGGAGAGCTGGAACCTGAAGGTGAAGGAGGAGTACGAGAAGGTGGAGAAGGAGTAC  
AAGACCCTGGAGGAGCGCATCAAGGAGGACATCCAGGCCCTGAAGGCCCTGGAGCAGTACGA  
GAAGGAGCGCCAGGAGCAGCTGCTGCGGACACCCTGAACACCAACGAGTACCGCCTGAGCA  
AGCGCGGCCTGCGCGGCTGGCGGAGATCATCCAGAAGTGGCTGAAGATGGACGAGAACGAG  
CCCAGCGAGAAGTACCTGGAGGTGTTCAAGGACTACCAGCGCAAGCACCCCCGCGAGGCCGG  
CGACTACAGCGTGTACGAGTTCCTGAGCAAGAAGGAGAACCATTTCATCTGGCGCAACCACC  
CCGAGTACCCCTACCTGTACGCCACCTTCTGCGAGATCGACAAGAAGAAGAAGGACGCCAAG  
CAGCAGGCCACCTTACCCTGGCCGACCCCATCAACCACCCCTGTGGGTGCGCTTCGAGGA  
GCGCAGCGGCAGCAACCTGAACAAGTACCGCATCCTGACCGAGCAGCTGCACACCGAGAAGC  
TGAAGAAGAAGCTGACCGTGCAGCTGGACCGCCTGATCTACCCACCGAGAGCGGCGGCTGG  
GAGGAGAAGGGCAAGGTGGACATCGTGTGCTGCCCAGCCGCCAGTTCATAACCAGATCTT  
CCTGGACATCGAGGAGAAGGGCAAGCACGCCTTACCTACAAGGACGAGAGCATCAAGTTCC  
CCCTGAAGGGCACCTGGGCGGCGCCCGGTGCAGTTCGACCGCGACCACCTGCGCCGCTAC  
CCCCACAAGGTGGAGAGCGGCAACGTGGGCCGATCTACTTCAACATGACCGTGAACATCGA  
GCCCACCGAGAGCCCCGTGAGCAAGAGCCTGAAGATCCACCGCGACGACTTCCCCAAGGTGG  
TGAACTTCAAGCCCAAGGAGCTGACCGAGTGGATCAAGGACAGCAAGGGCAAGAAGCTGAAG  
AGCGGCATCGAGAGCCTGGAGATCGGCCTGCGCGTGTGAGCATCGACCTGGGCCAGCGCCA  
GGCCGCCGCCAGCATCTTCGAGGTGGTGGACCAGAAGCCCGACATCGAGGGCAAGCTGT  
TCTTCCCATCAAGGGCACCGAGCTGTACGCCGTGCACCGCGCCAGCTTCAACATCAAGCTG  
CCCGGCGAGACCCTGGTGAAGAGCCGCGAGGTGCTGCGCAAGGCCCGCGAGGACAACCTGAA  
GCTGATGAACCAGAAGCTGAACTTCTGCGCAACGTGCTGCACTTCCAGCAGTTCGAGGACA  
TCACCGAGCGGAGAAGCGCGTGACCAAGTGGATCAGCCGCCAGGAGAACAGCGACGTGCC  
CTGGTGTACCAGGACGAGCTGATCCAGATCCGCGAGCTGATGTACAAGCCCTACAAGGACTG  
GGTGGCCTTCTGAAGCAGCTGCACAAGCGCCTGGAGGTGGAGATCGGCAAGGAGGTGAAGC  
ACTGGCGCAAGAGCCTGAGCGACGGCCGCAAGGGCCTGTACGGCATCAGCCTGAAGAACATC  
GACGAGATCGACCGCACCCGCAAGTTCCTGCTGCGCTGGAGCCTGCGCCCCACCGAGCCCGG  
CGAGGTGCGCCGCTGGAGCCCGGCCAGCGCTTCGCCATCGACCAGCTGAACCACCTGAACG  
CCCTGAAGGAGGACCGCCTGAAGAAGATGGCCAACACCATCATCATGCACGCCCTGGGCTAC

TGCTACGACGTGCGCAAGAAGAAGTGGCAGGCCAAGAACCCCGCCTGCCAGATCATCCTGTT  
CGAGGACCTGAGCAACTACAACCCCTACGAGGAGCGCAGCCGCTTCGAGAACAGCAAGCTGA  
TGAAGTGGAGCCCGCGGAGATCCCCCGCCAGGTGGCCCTGCAGGGCGAGATCTACGGCCTG  
CAGGTGGGCGAGGTGGGCGCCAGTTCAGCAGCCGCTTCACGCCAAGACCGGCAGCCCCGG  
CATCCGCTGCAGCGTGGTGACCAAGGAGAAGCTGCAGGACAACCGCTTCTTCAAGAACCTGC  
AGCGCGAGGGCCGCTGACCTGGACAAGATCGCCGTGCTGAAGGAGGGCGACCTGTACCCC  
GACAAGGGCGGCGAGAAGTTCATCAGCCTGAGCAAGGACCGCAAGTGCGTGACCACCCACGC  
CGACATCAACGCCGCCAGAACCCTGCAGAAGCGCTTCTGGACCCGCACCCACGGCTTCTACA  
AGGTGTACTGCAAGGCCTACCAGGTGGACGGCCAGACCGTGTACATCCCCGAGAGCAAGGAC  
CAGAAGCAGAAGATCATCGAGGAGTTCGGCGAGGGCTACTTCATCCTGAAGGACGGCGTGTA  
CGAGTGGGTGAACGCCGCAAGCTGAAGATCAAGAAGGGCAGCAGCAAGCAGAGCAGCAGCG  
AGCTGGTGGACAGCGACATCCTGAAGGACAGCTTCGACCTGGCCAGCGAGCTGAAGGGCGAG  
AAGCTGATGCTGTACCGCGACCCAGCGGCAACGTGTTCCCCAGCGACAAGTGATGGCCGC  
CGCGTGTTCCTCGGCAAGCTGGAGCGCATCCTGATCAGCAAGCTGACCAACCAGTACAGCA  
TCAGCACCATCGAGGACGACAGCAGCAAGCAGAGCATG

**Humanized Bs3Cas12b coding sequence from *Bacillus sp.* V3-13 contig\_40 (GeneBank ID:**

**NZ\_PGUZ01000040.1)**

ATGGCCATCCGCAGCATCAAGCTGAAGATGAAGACCAACAGCGGCACCGACAGCATCTACCT  
GCGCAAGGCCCTGTGGCGCACCCACCAGCTGATCAACGAGGGCATCGCCTACTACATGAACC  
TGCTGACCCTGTACCGCCAGGAGGCCATCGGCGACAAGACCAAGGAGGCCTACCAGGCCGAG  
CTGATCAACATCATCCGCAACCAGCAGCGCAACAACGGCAGCAGCGAGGAGCACGGCAGCGA  
CCAGGAGATCCTGGCCCTGCTGCGCCAGCTGTACGAGCTGATCATCCCCAGCAGCATCGGCG  
AGAGCGGCGACGCCAACCAGCTGGGCAACAAGTTCCTGTACCCCTGGTGGACCCCAACAGC  
CAGAGCGGCAAGGGCACCAGCAACGCCGCGCAAGCCCCGCTGGAAGCGCCTGAAGGAGGA  
GGGCAACCCCGACTGGGAGCTGGAGAAGAAGAAGGACGAGGAGCGCAAGGCCAAGGACCCCA  
CCGTGAAGATCTTCGACAACCTGAACAAGTACGGCCTGCTGCCCCTGTTCCCCCTGTTACC  
AACATCCAGAAGGACATCGAGTGGCTGCCCCTGGGCAAGCGCCAGAGCGTGCGCAAGTGGGA  
CAAGGACATGTTTCATCCAGGCCATCGAGCGCCTGCTGAGCTGGGAGAGCTGGAACCGCCGCG  
TGCCGACGAGTACAAGCAGCTGAAGGAGAAGACCGAGAGCTACTACAAGGAGCACCTGACC  
GGCGGCGAGGAGTGGATCGAGAAGATCCGCAAGTTCGAGAAGGAGCGCAACATGGAGCTGGA  
GAAGAACGCCTTCGCCCCCAACGACGGCTACTTCATCACCAGCCGCCAGATCCGCGGCTGGG  
ACCGCGTGTACGAGAAGTGGAGCAAGCTGCCCAGAGCGCCAGCCCCGAGGAGCTGTGGAAG  
GTGGTGGCCGAGCAGCAGAACAAGATGAGCGAGGGCTTCGGCGACCCCAAGGTGTTTCAGCTT  
CCTGGCCAACCGCGAGAACCGCGACATCTGGCGCGGCCACAGCGAGCGCATCTACCACATCG  
CCGCTACAACGGCCTGCAGAAGAAGCTGAGCCGCACCAAGGAGCAGGCCACCTTCACCCTG  
CCCGACGCCATCGAGCACCCCTGTGGATCCGCTACGAGAGCCCCGGCGGCACCAACCTGAA  
CCTGTTCAAGCTGGAGGAGAAGCAGAAGAAGAATACTACTACGTGACCCTGAGCAAGATCATCT  
GGCCCAGCGAGGAGAAGTGGATCGAGAAGGAGAACATCGAGATCCCCCTGGCCCCCAGCATC  
CAGTTC AACCGCCAGATCAAGCTGAAGCAGCACGTGAAGGGCAAGCAGGAGATCAGCTTCAG  
CGACTACAGCAGCCGCATCAGCCTGGACGGCGTGCTGGGCGGCAGCCGCATCCAGTTCAACC  
GCAAGTACATCAAGAACCACAAGGAGCTGCTGGGCGAGGGCGACATCGGCCCCGCTGTTCTTC  
AACCTGGTGGTGGACGTGGCCCCCTGCAGGAGACCCGCAACGGCCGCTGCAGAGCCCCAT

CGGCAAGGCCCTGAAGGTGATCAGCAGCGACTTCAGCAAGGTGATCGACTACAAGCCCAAGG  
AGCTGATGGACTGGATGAACACCGGCAGCGCCAGCAACAGCTTCGGCGTGGCCAGCCTGCTG  
GAGGGCATGCGCGTGATGAGCATCGACATGGGCCAGCGCACCAGCGCCAGCGTGAGCATCTT  
CGAGGTGGTGAAGGAGCTGCCAAGGACCAGGAGCAGAAGCTGTTCTACAGCATCAACGACA  
CCGAGCTGTTTCGCCATCCACAAGCGCAGCTTCCTGCTGAACCTGCCCGGCGAGGTGGTGACC  
AAGAACAACAAGCAGCAGCGCCAGGAGCGCCGCAAGAAGCGCCAGTTTCGTGCGCAGCCAGAT  
CCGCATGCTGGCCAACGTGCTGCGCCTGGAGACCAAGAAGACCCCCGACGAGCGCAAGAAGG  
CCATCCACAAGCTGATGGAGATCGTGAGAGCTACGACAGCTGGACCGCCAGCCAGAAGGAG  
GTGTGGGAGAAGGAGCTGAACCTGCTGACCAACATGGCCGCCTTCAACGACGAGATCTGGAA  
GGAGAGCCTGGTGGAGCTGCACCACCGCATCGAGCCCTACGTGGGCCAGATCGTGAGCAAGT  
GGCGCAAGGGCCTGAGCGAGGGCCGCAAGAACCTGGCCGGCATCAGCATGTGGAACATCGAC  
GAGCTGGAGGACACCCGCCGCCTGCTGATCAGCTGGAGCAAGCGCAGCCGCACCCCGGCGA  
GGCCAACCGCATCGAGACCGACGAGCCCTTCGGCAGCAGCCTGCTGCAGCACATCCAGAACG  
TGAAGGACGACCGCCTGAAGCAGATGGCCAACCTGATCATCATGACCGCCCTGGGCTTCAAG  
TACGACAAGGAGGAGAAGGACCGCTACAAGCGCTGGAAGGAGACCTACCCCGCCTGCCAGAT  
CATCCTGTTTCGAGAACCTGAACCGCTACCTGTTCAACCTGGACCGCAGCCGCCGCGAGAACA  
GCCGCCTGATGAAGTGGGCCCACCGCAGCATCCCCCGCACCGTGAGCATGCAGGGCGAGATG  
TTCGGCCTGCAGGTGGGCGACGTGCGCAGCGAGTACAGCAGCCGCTTCCACGCCAAGACCGG  
CGCCCCGGCATCCGCTGCCACGCCCTGACCGAGGAGGACCTGAAGGCCGGCAGCAACACCC  
TGAAGCGCCTGATCGAGGACGGCTTCATCAACGAGAGCGAGCTGGCCTACCTGAAGAAGGGC  
GACATCATCCCCAGCCAGGGCGGCGAGCTGTTTCGTGACCCTGAGCAAGCGCTACAAGAAGGA  
CAGCGACAACAACGAGCTGACCGTGATCCACGCCGACATCAACGCCGCCAGAACCTGCAGA  
AGCGCTTCTGGCAGCAGAACAGCGAGGTGTACCGCGTGCCCTGCCAGCTGGCCCGCATGGGC  
GAGGACAAGCTGTACATCCCCAAGAGCCAGACCAGACCATCAAGAAGTACTTCGGCAAGGG  
CAGCTTCGTGAAGAACAACACCGAGCAGGAGGTGTACAAGTGGGAGAAGAGCGAGAAGATGA  
AGATCAAGACCGACACCACCTTCGACCTGCAGGACCTGGACGGCTTCGAGGACATCAGCAAG  
ACCATCGAGCTGGCCAGGAGCAGCAGAAGAAGTACCTGACCATGTTCCGCGACCCCAGCGG  
CTACTTCTTCAACAACGAGACCTGGCGCCCCCAGAAGGAGTACTGGAGCATCGTGAACAACA  
TCATCAAGAGCTGCCTGAAGAAGAAGATCCTGAGCAACAAGGTGGAGCTG

**Humanized DiCas12b coding sequence from *Desulfovibrio inopinatus* DSM 10711  
(GeneBank: NZ\_KE386879.1)**

ATGCCACCCGCACCATCAACCTGAAGCTGGTGTGCTGGGCAAGAACCCCGAGAACGCCACCCT  
GCGCCGCGCCCTGTTTCAGCACCCACCGCCTGGTGAACCAGGCCACCAAGCGCATCGAGGAGT  
TCCTGCTGCTGTGCCGCGGCGAGGCCTACCGCACCGTGGACAACGAGGGCAAGGAGGCCGAG  
ATCCCCCGCCACGCCGTGCAGGAGGAGGCCCTGGCCTTCGCCAAGGCCGCCAGCGCCACAA  
CGGCTGCATCAGCACCTACGAGGACCAGGAGATCCTGGACGTGCTGCGCCAGCTGTACGAGC  
GCCTGGTGGCCAGCGTGAACGAGAACAACGAGGCCGGCGACGCCAGGCCGCCAACGCCTGG  
GTGAGCCCCCTGATGAGCGCCGAGAGCGAGGGCGGCCTGAGCGTGTACGACAAGGTGCTGGA  
CCCCCCCCCGTGTGGATGAAGCTGAAGGAGGAGAAGGCCCCCCGGCTGGGAGGCCGCCAGCC  
AGATCTGGATCCAGAGCGACGAGGGCCAGAGCCTGCTGAACAAGCCCGCAGCCCCCCCCGC  
TGGATCCGCAAGCTGCGCAGCGGCCAGCCCTGGCAGGACGACTTCGTGAGCGACCAGAAGAA  
GAAGCAGGACGAGCTGACCAAGGGCAACGCCCCCTGATCAAGCAGCTGAAGGAGATGGGCC  
TGCTGCCCTGGTGAACCCCTTCTTCCGCCACCTGCTGGACCCCGAGGGCAAGGGCGTGAGC

CCCTGGGACCGCCTGGCCGTGCGCGCCGCGCTGGCCCACTTCATCAGCTGGGAGAGCTGGAA  
CCACCGCACCCGCGCCGAGTACAACAGCCTGAAGCTGCGCCGCGACGAGTTCGAGGCCGCCA  
GCGACGAGTTCAAGGACGACTTCACCCTGCTGCGCCAGTACGAGGCCAAGCGCCACAGCACC  
CTGAAGAGCATCGCCCTGGCCGACGACAGCAACCCCTACCGCATCGGCGTGCAGCCTGCG  
CGCCTGGAACCGCGTGCAGGAGTGGATCGACAAGGGCGCCACCGAGGAGCAGCGCGTGA  
CCATCCTGAGCAAGCTGCAGACCCAGCTGCGCGGCAAGTTCGGCGACCCCGACCTGTTCAAC  
TGGCTGGCCCAGGACCGCCACGTGCACCTGTGGAGCCCCGCGACAGCGTGACCCCTGGT  
GCGCATCAACGCCGTGGACAAGGTGCTGCGCCGCGCAAGCCCTACGCCCTGATGACCTTCG  
CCCACCCCGCTTCCACCCCGCTGGATCCTGTACGAGGCCCGGCGGCAGCAACCTGCGC  
CAGTACGCCCTGGACTGCACCCGAGAACGCCCTGCACATCACCTGCCCTGCTGGTGGACGA  
CGCCACGGCACCTGGATCGAGAAGAAGATCCGCGTGCCCTGGCCCCAGCGCCAGATCC  
AGGACCTGACCCCTGGAGAAGCTGGAGAAGAAGAAGAACCGCCTGTACTACCGCAGCGGCTTC  
CAGCAGTTCGCCGGCCTGGCCGGCGGCCGAGGTGCTGTTCCACCGCCCCTACATGGAGCA  
CGACGAGCGCAGCGAGGAGAGCCTGCTGGAGCGCCCCGGCGCCGTGTGGTTCAAGCTGACCC  
TGGACGTGGCCACCCAGGCCCCCCCCAACTGGCTGGACGGCAAGGGCCGCGTGCAGCACC  
CCCGAGGTGCACCACTTCAAGACCGCCCTGAGCAACAAGAGCAAGCACACCCGCACCCTGCA  
GCCCGCCCTGCGCGTGTGAGCGTGGACCTGGGCATGCGCACCTTCGCCAGCTGCAGCGTGT  
TCGAGCTGATCGAGGGCAAGCCGAGACCGGCCGCGCCTTCCCCGTGGCCGACGAGCGCAGC  
ATGGACAGCCCCAACAAAGCTGTGGGCCAAGCACGAGCGCAGCTTCAAGCTGACCCCTGCCGG  
CGAGACCCCGAGCCGCAAGGAGGAGGAGGAGCGCAGCATCGCCCGCGCCGAGATCTACGCC  
TGAAGCGCGACATCCAGCGCTGAAGAGCCTGCTGCGCCTGGGCGAGGAGGACAACGACAAC  
CGCCGCGACGCCCTGCTGGAGCAGTTCTTCAAGGGCTGGGGCGAGGAGACGTGGTGCCCGG  
CCAGGCCTTCCCCGCGAGCCTGTTCCAGGGCTGGGCGCCGCCCTTCCGCAGCACCCCG  
AGCTGTGGCGCCAGCACTGCCAGACCTACTACGACAAGGCCGAGGCCTGCCTGGCCAAGCAC  
ATCAGCGACTGGCGCAAGCGCACCCGCCCGCCCCACCAGCCGCGAGATGTGGTACAAGAC  
CCGCAGCTACCACGGCGGCAAGAGCATCTGGATGCTGGAGTACCTGGACGCCGTGCGCAAGC  
TGCTGCTGAGCTGGAGCCTGCGCGGCCGACCTACGGCGCCATCAACCGCCAGGACACCGCC  
CGCTTCGGCAGCCTGGCCAGCCGCCTGCTGCACCACATCAACAGCCTGAAGGAGGACCGCAT  
CAAGACCGGCGCCGACAGCATCGTGCAGGCCGCCCGCGGCTACATCCCCCTGCCCCACGGCA  
AGGGCTGGGAGCAGCGCTACGAGCCCTGCCAGCTGATCCTGTTTCGAGGACCTGGCCCCGTAC  
CGCTTCCGCGTGGACCGCCCCGCCGCGAGAACAGCCAGCTGATGCAGTGAACCACCGCGC  
CATCGTGGCCGAGACCACCATGCAGGCCGAGCTGTACGGCCAGATCGTGGAGAACACCGCCG  
CCGGCTTCAGCAGCCGCTTCCACGCCGCCACCGGCGCCCCCGGCGTGCCTGCCGCTTCCTG  
CTGGAGCGCGACTTCGACAACGACCTGCCCAAGCCCTACCTGCTGCGCGAGCTGAGCTGGAT  
GCTGGGCAACACCAAGGTGGAGAGCGAGGAGGAGAAGCTGCGCCTGCTGAGCGAGAAGATCC  
GCCCCGGCAGCCTGGTGCCTGGGACGGCGGCGAGCAGTTCGCCACCCTGCACCCCAAGCGC  
CAGACCCTGTGCGTGATCCACGCCGACATGAACGCCGCCAGAACCTGCAGCGCCGCTTCTT  
CGGCCGCTGCGGCGAGGCCTTCCGCCTGGTGTGCCAGCCCCACGGCGACGACGTGCTGCGCC  
TGCCAGCACCCCCGGCGCCCGCCTGCTGGGCGCCCTGCAGCAGCTGGAGAACGGCCAGGGC  
GCCTTCGAGCTGGTGCAGCAGATGGGCAGCACCAGCCAGATGAACCGCTTCGTGATGAAGAG  
CCTGGGCAAGAAGAAGATCAAGCCCTGCAGGACAACAACGGCGACGACGAGCTGGAGGACG  
TGCTGAGCGTGTGCCCGAGGAGGACGACACCGGCCGCATCACCGTGTTCGCGACAGCAGC  
GGCATCTTCTTCCCCTGCAACGTGTGGATCCCCGCCAAGCAGTTCTGGCCCGCCGTGCGCGC  
CATGATCTGGAAGGTGATGGCCAGCCACAGCCTGGGC

**Humanized LsCas12b coding sequence from *Laceyella sediminis* strain RHA1 (GeneBank**

**ID: NZ\_PVTZ01000002.1)**

ATGAGCATCCGCAGCTTCAAGCTGAAGATCAAGACCAAGAGCGGCGTGAACGCCGAGGAGCT  
GCGCCGCGCCTGTGGCGCACCCACCAGCTGATCAACGACGGCATCGCCTACTACATGAACT  
GGCTGGTGTCTGCTGCGCCAGGAGGACCTGTTTCATCCGCAACGAGGAGACCAACGAGATCGAG  
AAGCGCAGCAAGGAGGAGATCCAGGGCGAGCTGCTGGAGCGCGTGCACAAGCAGCAGCAGCG  
CAACCAGTGGAGCGGCGAGGTGGACGACCAGACCCTGCTGCAGACCCTGCGCCACCTGTACG  
AGGAGATCGTGGCCAGCGTGTATCGGCAAGAGCGGCAACGCCAGCCTGAAGGCCCGCTTCTTC  
CTGGGCCCCCTGGTGGACCCCCAACAACAAGACCACCAAGGACGTGAGCAAGAGCGGCCCCAC  
CCCCAAGTGGAGAAGATGAAGGACGCCGGCGACCCCAACTGGGTGCAGGAGTACGAGAAGT  
ACATGGCCGAGCGCCAGACCCTGGTGCGCCTGGAGGAGATGGGCCTGATCCCCCTGTTCCCC  
ATGTACACCGACGAGGTGGGCGACATCCACTGGCTGCCCCAGGCCAGCGGCTACACCCGCAC  
CTGGGACCGCGACATGTTCCAGCAGGCCATCGAGCGCCTGCTGAGCTGGGAGAGCTGGAACC  
GCCGCGTGCAGCGAGCGCCGCGCCAGTTTCGAGAAGAAGACCCACGACTTCGCCAGCCGCTTC  
AGCGAGAGCGACGTGCAGTGGATGAACAAGCTGCGCGAGTACGAGGCCAGCAGGAGAAGAG  
CCTGGAGGAGAACGCCTTCGCCCCAACGAGCCCTACGCCCTGACCAAGAAGGCCCTGCGCG  
GCTGGGAGCGCGTGTACCACAGCTGGATGCGCCTGGACAGCGCCGCCAGCGAGGAGGCCTAC  
TGGCAGGAGGTGGCCACCTGCCAGACCGCCATGCGCGGGGAGTTCGGCGACCCCGCCATCTA  
CCAGTTCCTGGCCAGAAGGAGAACCACGACATCTGGCGGGCTACCCCGAGCGCGTGTATCG  
ACTTCGCCGAGCTGAACCACCTGCAGCGCGAGCTGCGCCGCGCAAGGAGGACGCCACCTTC  
ACCCTGCCCCGACAGCGTGGACCACCCCTGTGGGTGCGCTACGAGGCCCCCGGCGGCACCAA  
CATCCACGGCTACGACCTGGTGCAGGACACCAAGCGCAACCTGACCCTGATCCTGGACAAGT  
TCATCCTGCCCGACGAGAACGGCAGCTGGCAGGAGGTGAAGAAGGTGCCCTTCAGCCTGGCC  
AAGAGCAAGCAGTTCACCCGCCAGGTGTGGCTGCAGGAGGAGCAGAAGCAGAAGAAGCGCGA  
GGTGGTGTTCACGACTACAGCACCAACCTGCCCCACCTGGGCACCCCTGGCCGGCGCCAAGC  
TGCAGTGGGACCGCAACTTCTGAACAAGCGCACCCAGCAGCAGATCGAGGAGACCGGCGAG  
ATCGGCAAGGTGTTCTTCAACATCAGCGTGGACGTGCGCCCCGCCGTGGAGGTGAAGAACGG  
CCGCCTGCAGAACGGCCTGGGCAAGGCCCTGACCGTGTGACCCACCCGACGGCACCAAGA  
TCGTGACCGGCTGGAAGGCCGAGCAGCTGGAGAAGTGGGTGGGCGAGAGCGGCCGCGTGTGAGC  
AGCCTGGGCCTGGACAGCCTGAGCGAGGGCCTGCGCGTGTATGAGCATCGACCTGGGCCAGCG  
CACCAGCGCCACCGTGTGAGCGTGTTCGAGATCACCAAGGAGGCCCCCGACAACCCCTACAAGT  
TCTTCTACCAGCTGGAGGGCACCGAGCTGTTTCGCCGTGCACCAGCGCAGCTTCTGCTGGCC  
CTGCCCCGGCGAGAACCCCCCCCAGAAGATCAAGCAGATGCGCGAGATCCGCTGGAAGGAGCG  
CAACCGCATCAAGCAGCAGGTGGACCAGCTGAGCGCCATCCTGCGCCTGCACAAGAAGGTGA  
ACGAGGACGAGCGCATCCAGGCCATCGACAAGCTGCTGCAGAAGGTGGCCAGCTGGCAGCTG  
AACGAGGAGATCGCCACCGCCTGGAACCAGGCCCTGAGCCAGCTGTACAGCAAGGCCAAGGA  
GAACGACCTGCAGTGGAAACCAGGCCATCAAGAACGCCACCACCAGCTGGAGCCCGTGGTGG  
GCAAGCAGATCAGCCTGTGGCGCAAGGACCTGAGCACCGGCCGCCAGGGCATCGCCGGCCCTG  
AGCCTGTGGAGCATCGAGGAGCTGGAGGCCACCAAGAAGCTGCTGACCCGCTGGAGCAAGCG  
CAGCCGCGAGCCCGGCGTGGTGAAGCGCATCGAGCGCTTCGAGACCTTCGCCAAGCAGATCC  
AGCACCACATCAACCAGGTGAAGGAGAACC GCCTGAAGCAGCTGGCCAACCTGATCGTGATG  
ACCGCCCTGGGCTACAAGTACGACCAGGAGCAGAAGAAGTGGATCGAGGTGTACCCCGCCTG

CCAGGTGGTGCTGTTTCGAGAACCTGCGCAGCTACCGCTTCAGCTACGAGCGCAGCCGCCGCG  
AGAACAAGAAGCTGATGGAGTGGAGCCACCGCAGCATCCCCAAGCTGGTGCAGATGCAGGGC  
GAGCTGTTTCGGCCTGCAGGTGGCCGACGTGTACGCCGCTACAGCAGCCGCTACCACGGCCG  
CACCGGCGCCCCGGCATCCGCTGCCACGCCCTGACCGAGGCCGACCTGCGCAACGAGACCA  
ACATCATCCACGAGCTGATCGAGGCCGGCTTCATCAAGGAGGAGCACCGCCCCCTACCTGCAG  
CAGGGCGACCTGGTGGCCCTGGAGCGGCGGCGAGCTGTTTCGCCACCCTGCAGAAGCCCTACGA  
CAACCCCGCATCCTGACCCTGCACGCCGACATCAACGCCGCCAGAACATCCAGAAGCGCT  
TCTGGCACCCAGCATGTGGTTCGCGCTGAACTGCGAGAGCGTGATGGAGGGCGAGATCGTG  
ACCTACGTGCCCAAGAACAAGACCGTGCACAAGAAGCAGGGCAAGACCTTCCGCTTCGTGAA  
GGTGGAGGGCAGCGACGTGTACGAGTGGGCCAAGTGGAGCAAGAACCGCAACAAGAACACCT  
TCAGCAGCATCACCGAGCGCAAGCCCCCAGCAGCATGATCCTGTTCCGCGACCCAGCGGC  
ACCTTCTTCAAGGAGCAGGAGTGGGTGGAGCAGAAGACCTTCTGGGGCAAGGTGCAGAGCAT  
GATCCAGGCCTACATGAAGAAGACCATCGTGCAGCGCATGGAGGAG

**Humanized SbCas12b coding sequence from *Spirochaetes bacterium* GWB1\_27\_13**

**(GeneBank ID: MIAN0100063.1)**

ATGAGCTTACCATCAGCTACCCCTTCAAGCTGATCATCAAGAACAAGGACGAGGCCAAGGC  
CCTGCTGGACACCCACCAGTACATGAACGAGGGCGTGAAGTACTACCTGGAGAAGCTGCTGA  
TGTTCCGCCAGGAGAAGATCTTCATCGGCGAGGACGAGACCGGCAAGCGCATCTACATCGAG  
GAGACCGAGTACAAGAAGCAGATCGAGGAGTTCTACCTGATCAAGAAGACCGAGCTGGGCCG  
CAACCTGACCCTGACCCTGGACGAGTTCAAGACCCTGATGCGCGAGCTGTACATCTGCCTGG  
TGAGCAGCAGCATGGAGAACAAGAAGGGCTTCCCCAACGCCAGCAGGCCAGCCTGAACATC  
TTCAGCCCCCTGTTTCGACGCCGAGAGCAAGGGCTACATCCTGAAGGAGGAGAACAACAACAT  
CAGCCTGATCCACAAGGACTACGGCAAGATCCTGCTGAAGCGCCTGCGCGACAACAACCTGA  
TCCCCATCTTACCAAGTTCACCGACATCAAGAAGATCACCGCCAAGCTGAGCCCCACCGCC  
CTGGACCGCATGATCTTCGCCCAGGCCATCGAGAAGCTGCTGAGCTACGAGAGCTGGTGCAA  
GCTGATGATCAAGGAGCGCTTCGACAAGGAGGTGAAGATCAAGGAGCTGGAGAACAAGTGCG  
AGAACAAGCAGGAGCGCGACAAGATCTTCGAGATCCTGGAGAAGTACGAGGAGGAGCGCCAG  
AAGACCTTCGAGCAGGACAGCGGCTTCGCCAAGAAGGGCAAGTTCTACATCACCGGCCGCAT  
GCTGAAGGGCTTCGACGAGATCAAGGAGAAGTGGCTGAAGGAGAAGGACCGCAGCGAGCAGA  
ACCTGATCAACATCCTGAACAAGTACCAGACCGACAACAGCAAGCTGGTGGGCGACCGCAAC  
CTGTTTCGAGTTCATCATCAAGCTGGAGAACCAGTGCCTGTGGAACGGCGACATCGACTACCT  
GAAGATCAAGCGGACATCAACAAGAACCAGATCTGGCTGGACCGCCCCGAGATGCCCCGCT  
TCACCATGCCCGACTTCAAGAAGCACCCCTGTGGTACCGCTACGAGGACCCCAAGCAACAGC  
AACTTCCGCAACTACAAGATCGAGGTGGTGAAGGACGAGAACTACATCACCATCCCCCTGAT  
CACCGAGCGCAACAACGAGTACTTCGAGGAGAACTACACCTTCAACCTGGCCAAGCTGAAGA  
AGCTGAGCGAGAACATCACCTTCATCCCCAAGAGCAAGAACAAGGAGTTCGAGTTCATCGAC  
AGCAACGACGAGGAGGAGGACAAGAAGGACCAGAAGAAGAGCAAGCAGTACATCAAGTACTG  
CGACACCGCCAAGAACACCAGCTACGGCAAGAGCGGCGGCATCCGCCTGTACTTCAACCGCA  
ACGAGCTGGAGAACTACAAGGACGGCAAGAAGATGGACAGCTACACCGTGTTCACCCTGAGC  
ATCCGCGACTACAAGAGCCTGTTTCGCCAAGGAGAAGCTGCAGCCCCAGATCTTCAACACCGT  
GGACAACAAGATCACCGCCTGAAGATCCAGAAGAAGTTCGGCAACGAGGAGCAGACCAACT  
TCCTGAGCTACTTACCCAGAACCAGATCACCAAGAAGGACTGGATGGACGAGAAGACCTTC

CAGAACGTGAAGGAGCTGAACGAGGGCATCCGCGTGCTGAGCGTGGACCTGGGCCAGCGCTT  
CTTCGCCGCCGTGAGCTGCTTCGAGATCATGAGCGAGATCGACAACAACAAGCTGTTCTTCA  
ACCTGAACGACCAGAACCACAAGATCATCCGCATCAACGACAAGAATACTACGCCAAGCAC  
ATCTACAGCAAGACCATCAAGCTGAGCGGGGAGGACGACGACCTGTACAAGGAGCGCAAGAT  
CAACAAGAATACTACAAGCTGAGCTACCAGGAGCGCAAGAACAAGATCGGCATCTTCACCCGCC  
AGATCAACAAGCTGAACCAGCTGCTGAAGATCATCCGCAACGACGAGATCGACAAGGAGAAG  
TTCAAGGAGCTGATCGAGACCACCAAGCGCTACGTGAAGAACACCTACAACGACGGCATCAT  
CGACTGGAACAACGTGGACAACAAGATCCTGAGCTACGAGAACAAGGAGGACGTGATCAACC  
TGCACAAGGAGCTGGACAAGAAGCTGGAGATCGACTTCAAGGAGTTCATCCGCGAGTGCCGC  
AAGCCCATCTTCGCGAGCGGGCCTGAGCATGCAGCGCATCGACTTCCTGGAGAAGCTGAA  
CAAGCTGAAGCGCAAGTGGGTGGCCCGCACCCAGAAGAGCGCCGAGAGCATCGTGCTGACCC  
CCAAGTTCGGCTACAAGCTGAAGGAGCACATCAACGAGCTGAAGGACAACCGCGTGAAGCAG  
GGCGTGAATACTACATCCTGATGACCGCCCTGGGCTACATCAAGGACAACGAGATCAAGAACGA  
CAGCAAGAAGAAGCAGAAGGAGGACTGGGTGAAGAAGAACCAGCGCCTGCCAGATCATCTGA  
TGGAGAAGCTGACCGAGTACACCTTCGCGGAGGACCGCCCCGCGAGGAGAACAGCAAGCTG  
CGCATGTGGAGCCACCGCCAGATCTTCAACTTCCTGCAGCAGAAGGCCAGCCTGTGGGGCAT  
CCTGGTGGGGCAGCTGTTTCGCCCCCTACACCAGCAAGTGCCTGAGCGACAACAACGCCCCG  
GCATCCGCTGCCACCAGGTGACCAAGAAGGACCTGATCGACAACAGCTGGTTCCTGAAGATC  
GTGGTGAAGGACGACGCCTTCTGCGACCTGATCGAGATCAACAAGGAGAACGTGAAGAACAA  
GAGCATCAAGATCAACGACATCCTGCCCTGCGCGGGCGGAGCTGTTTCGCCAGCATCAAGG  
ACGGCAAGCTGCACATCGTGCAGGCCGACATCAACGCCAGCCGCAACATCGCCAAGCGCTTC  
CTGAGCCAGATCAACCCCTTCGCGTGGTGCTGAAGAAGGACAAGGACGAGACCTTCCACCT  
GAAGAACGAGCCCACTACCTGAAGAATACTACAGCATCCTGAACTTCGTGCCACCAACG  
AGGAGCTGACCTTCTTCAAGGTGGAGGAGAACAAGGACATCAAGCCACCAAGCGCATCAAG  
ATGGACAAGCACGAGAAGGAGAGCACCGACGAGGGCGACGACTACAGCAAGAACCAGATCGC  
CCTGTTCCGCGACGACAGCGGCATCTTCTTCGACAAGAGCCTGTGGGTGGACGGCAAGATCT  
TCTGGAGCGTGGTGAAGAACAAGATGACCAAGCTGCTGCGGAGCGCAACAACAAGAAGAAC  
GGCAGCAAG

**Humanized TcCas12b coding sequence from *Tuberibacillus calidus* DSM 17572  
(GeneBank ID: NZ\_KE387196.1)**

ATGAACATCCACCTGAAGGAGCTGATCCGCATGGCCACCAAGAGCTTCATCCTGAAGATGAA  
GACCAAGAACAACCCCCAGCTGCGCCTGAGCCTGTGGAAGACCCACGAGCTGTTCAACTTCG  
GCGTGGCCTACTACATGGACCTGCTGAGCCTGTTCCGCCAGAAGGACCTGTACATGCACAAC  
GACGAGGACCCCCGACCACCCCGTGGTGTGAAGAAGGAGGAGATCCAGGAGCGCCTGTGGAT  
GAAGGTGCGCGAGACCCAGCAGAAGAACGGCTTCCACGGCGAGGTGAGCAAGGACGAGGTGC  
TGGAGACCCTGCGCGCCCTGTACGAGGAGCTGGTGCACGCGCCGTGGGCAAGAGCGGGCAG  
GCCAACCAGATCAGCAACAAGTACCTGTACCCCTGACCGACCCCGCCAGCCAGAGCGGCAA  
GGGCACCGCCAACAGCGGCCGCAAGCCCCGCTGGAAGAAGCTGAAGGAGGCCGGCGACCCCA  
GCTGGAAGGACGCCTACGAGAAGTGGGAGAAGGAGCGCCAGGAGGACCCCAAGCTGAAGATC  
CTGGCCGCCCTGCAGAGCTTCGGCCTGATCCCCCTGTTCCGCCCTTCACCGAGAACGACCA  
CAAGGCCGTGATCAGCGTGAAGTGGATGCCCAAGAGCAAGAACCAGAGCGTGCACAAGTTCG  
ACAAGGACATGTTCAACCAGGCCATCGAGCGCTTCCTGAGCTGGGAGAGCTGGAACGAGAAG  
GTGGCCGAGGACTACGAGAAGACCGTGAAGCATCTACGAGAGCCTGCAGAAGGAGCTGAAGGG

CATCAGCACCAAGGCCTTCGAGATCATGGAGCGCGTGGAGAAGGCCTACGAGGCCACCTGC  
GCGAGATCACCTTCAGCAACAGCACCTACCGCATCGGCAACCGCGCCATCCGCGGCTGGACC  
GAGATCGTGAAGAAGTGGATGAAGCTGGACCCAGCGCCCCCAGGGCAACTACCTGGACGT  
GGTGAAGGACTACCAGCGCCGCCACCCCCGCGAGAGCGGCGACTTCAAGCTGTTTCGAGCTGC  
TGAGCCGCCCCGAGAACCAGGCCGCTGGCGGAGTACCCCGAGTTCCTGCCCTGTACGTG  
AAGTACCGCCACGCCGAGCAGCGCATGAAGACCGCCAAGAAGCAGGCCACCTTCACCCTGTG  
CGACCCCATCCGCCACCCCTGTGGGTGCGCTACGAGGAGCGCAGCGGCACCAACCTGAACA  
AGTACCGCCTGATCATGAACGAGAAGGAGAAGGTGGTGCAGTTCGACCGCCTGATCTGCCTG  
AACGCCGACGGCCACTACGAGGAGCAGGAGGACGTGACCGTGCCCTGGCCCCAGCCAGCA  
GTTTCGACGACCAGATCAAGTTCAGCAGCGAGGACACCGGCAAGGGCAAGCACAACCTTCAGCT  
ACTACCACAAGGGCATCAACTACGAGCTGAAGGGCACCTGGGCGGCGCCCGCATCCAGTTC  
GACCGCGAGCACCTGCTGCGCCGCCAGGGCGTGAAGGCCGGCAACGTGGGCCGCATCTTCCT  
GAACGTGACCCTGAACATCGAGCCCATGCAGCCCTTCAGCCGCAGCGGCAACCTGCAGACCA  
GCGTGGGCAAGGCCCTGAAGGTGTACGTGGACGGCTACCCCAAGGTGGTGAACCTTCAAGCCC  
AAGGAGCTGACCGAGCACATCAAGGAGAGCGAGAAGAACACCCTGACCCTGGGCGTGGAGAG  
CCTGCCACCCGGCTGCGCGTGTAGCGTGGACCTGGGCCAGCGCCAGGCCGCGCCATCA  
GCATCTTCGAGGTGGTGTAGCGAGAAGCCCGACGACAACAAGCTGTTCTACCCCGTGAAGGAC  
ACCGACCTGTTTCGCCGTGCACCGCACCAGCTTCAACATCAAGCTGCCCGGCGAGAAGCGCAC  
CGAGCGCCGCATGCTGGAGCAGCAGAAGCGCGACCAGGCCATCCGCGACCTGAGCCGCAAGC  
TGAAGTTCCTGAAGAACGTGCTGAACATGCAGAAGCTGGAGAAGACCGACGAGCGCGAGAAG  
CGCGTGAACCGCTGGATCAAGGACCGCGAGCGCGAGGAGGAGAACCCCGTGTACGTGCAGGA  
GTTTCGAGATGATCAGCAAGGTGCTGTACAGCCCCACAGCGTGTGGGTGGACCAGCTGAAGA  
GCATCCACCGCAAGCTGGAGGAGCAGCTGGGCAAGGAGATCAGCAAGTGGCGCCAGAGCATC  
AGCCAGGGCCCGCAGGGCGTGTACGGCATCAGCCTGAAGAACATCGAGGACATCGAGAAGAC  
CCGCCGCTGCTGTTCCGCTGGAGCATGCGCCCCGAGAACCCCGCGAGGTGAAGCAGCTGC  
AGCCCGGCGAGCGCTTCGCCATCGACCAGCAGAACCACCTGAACCACCTGAAGGACGACCGC  
ATCAAGAAGCTGGCCAACCAGATCGTGTACCGCCCTGGGCTACCGCTACGACGGCAAGCG  
CAAGAAGTGGATCGCCAAGCACCCCGCCTGCCAGCTGGTGTGTTTCGAGGACCTGAGCCGCT  
ACGCCTTCTACGACGAGCGCAGCCGCTGGAGAACCGCAACCTGATGCGCTGGAGCCGCCGC  
GAGATCCCCAAGCAGGTGGCCAGATCGGCGGCCTGTACGGCCTGCTGGTGGGCGAGGTGGG  
CGCCAGTACAGCAGCCGCTTCCACGCCAAGAGCGGCGCCCCCGCATCCGCTGCCGCTGG  
TGAAGGAGCACGAGCTGTACATCACCGAGGGCGGCCAGAAGGTGCGCAACCAGAAGTTCCTG  
GACAGCCTGGTGGAGAACAACATCATCGAGCCCGACGACGCCCCGCCCTGGAGCCCGGCGA  
CCTGATCCGCGACCAGGGCGGCGACAAGTTCGCCACCCTGGACGAGCGGCGGAGCTGGTGA  
TCACCCACGCCGACATCAACGCCGCCAGAACCTGCAGAAGCGCTTCTGGACCCGCACCCAC  
GGCCTGTACCGCATCCGCTGCGAGAGCCGCGAGATCAAGGACGCCGTGGTGTGGTGGCCAG  
CGACAAGGACCAGAAGGAGAAGATGGAGAACCTGTTTCGGCATCGGCTACCTGCAGCCCTTCA  
AGCAGGAGAACGACGTGTACAAGTGGGTGAAGGGCGAGAAGATCAAGGGCAAGAAGACCAGC  
AGCCAGAGCGACGACAAGGAGCTGGTGTAGCGAGATCCTGCAGGAGGCGAGCGTGTGGCCGA  
CGAGCTGAAGGGCAACCGCAAGACCCTGTTCCGCGACCCAGCGGCTACGTGTTCCCCAAGG  
ACCGTGGTACACCGGCGGCGCTACTTCGGCACCCCTGGAGCACCTGCTGAAGCGCAAGCTG  
GCCGAGCGCCGCTGTTTCGACGCGGCGAGCAGCCGCGCGCCTGTTCAACGGCACCGACAG  
CAACACCAACGTGGAG



### pUC19-U6-BhsgRNA partial sequence

(U6-BhsgRNA1\_scaffold-*BasI*-*BasI*-terminator)

TGTAAAACGACGGCCAGTGAATTCGAGGGCCTATTTCCCATGATTCCTTCATATTTGCATAT  
ACGATACAAGGCTGTTAGAGAGATAATTGGAATTAATTTGACTGTAAACACAAAGATATTAG  
TACAAAATACGTGACGTAGAAAAGTAATAATTTCTTGGGTAGTTTGCAGTTTTAAAATTATGT  
TTTAAAATGGACTATCATATGCTTACCGTAACTTGAAAGTATTTTCGATTTCTTGGCTTTATA  
TATCTTGTGGAAAGGACGAAACACCGGGAGGTTCTGTCTTTTGGTCAGGACAACCGTCTAGC  
TATAAGTGCTGCAGGGTGTGAGAACTCCTATTGCTGGACGATGTCTCTTACGAGGCATTAG  
CACAGAGACCGAGAGAGGGTCTCAttttttttAAGCTTGGCGTAATCATGGTCATAGCTGTT  
TCCTG

### pUC19-U6-Bs3sgRNA partial sequence

(U6-Bs3sgRNA1\_scaffold-*BasI*-*BasI*-terminator)

TGTAAAACGACGGCCAGTGAATTCGAGGGCCTATTTCCCATGATTCCTTCATATTTGCATAT  
ACGATACAAGGCTGTTAGAGAGATAATTGGAATTAATTTGACTGTAAACACAAAGATATTAG  
TACAAAATACGTGACGTAGAAAAGTAATAATTTCTTGGGTAGTTTGCAGTTTTAAAATTATGT  
TTTAAAATGGACTATCATATGCTTACCGTAACTTGAAAGTATTTTCGATTTCTTGGCTTTATA  
TATCTTGTGGAAAGGACGAAACACCGGGGTGACCTATAGGGTCAATGAATCTGTGCGTGTGC  
CATAAGTAATTAATAATTACCCACCACAGGATTATCTTATTTCTGCTAAGTGTTAGTTGCC  
TGAATACTTAGCAGAAATAATGATGATTGGCACAGAGACCGAGAGAGGGTCTCAtttttttt  
AAGCTTGGCGTAATCATGGTCATAGCTGTTTCCTG

### pUC19-U6-LssgRNA partial sequence

(U6-Bs3sgRNA1\_scaffold-*BasI*-*BasI*-terminator)

TGTAAAACGACGGCCAGTGAATTCGAGGGCCTATTTCCCATGATTCCTTCATATTTGCATAT  
ACGATACAAGGCTGTTAGAGAGATAATTGGAATTAATTTGACTGTAAACACAAAGATATTAG  
TACAAAATACGTGACGTAGAAAAGTAATAATTTCTTGGGTAGTTTGCAGTTTTAAAATTATGT  
TTTAAAATGGACTATCATATGCTTACCGTAACTTGAAAGTATTTTCGATTTCTTGGCTTTATA  
TATCTTGTGGAAAGGACGAAACACCGGGGCAAAGAATACTGTGCGTGTGCTAAGGATGGAAA  
AAATCCATTCAACCACAGGATTACATTATTTATCTAATCACTTAAATCTTTAAGTGATTAGA  
TGAATTAATGTGATTAGCACAGAGACCGAGAGAGGGTCTCAttttttttAAGCTTGGCGTA  
ATCATGGTCATAGCTGTTTCCTG

### pUC19-U6-SbsgRNA partial sequence

(U6-Bs3sgRNA1\_scaffold-*BasI*-*BasI*-terminator)

TGTAAAACGACGGCCAGTGAATTCGAGGGCCTATTTCCCATGATTCCTTCATATTTGCATAT  
ACGATACAAGGCTGTTAGAGAGATAATTGGAATTAATTTGACTGTAAACACAAAGATATTAG  
TACAAAATACGTGACGTAGAAAAGTAATAATTTCTTGGGTAGTTTGCAGTTTTAAAATTATGT  
TTTAAAATGGACTATCATATGCTTACCGTAACTTGAAAGTATTTTCGATTTCTTGGCTTTATA  
TATCTTGTGGAAAGGACGAAACACCGGGTCTTAGGGTATATCCCAAATTTGTCTTAGTATGT

GCATTGCTTACAGCGACAACCTAAGGTTTGTTTATCTTTTTTTTACATTGTAAGATGTTTAC  
ATTATAAAAAGAAGATAATCTTATTGCACA*GAGACC*GAGAGAG*GGTCTC*AttttttttAAGC  
TTGGCGTAATCATGGTCATAGCTGTTTCCTG
